# Supplementary material for: Continuous flow hydrogenolysis of 5-hydroxymethylfurfural into 2,5-dimethylfuran over alumina-supported nickel–iron alloy catalysts
Source: Royal Society of Chemistry journal article supplement (doi:10.1039/d2se01683d), 2023-01-01
Supplement: d2se01683d1.pdf [file d2se01683d1.pdf]

## Supplementary Information

# Continuous flow hydrogenolysis of 5-hydroxymethylfurfural into 2,5-dimethylfuran over alumina-supported nickel-iron alloy catalysts

Munsuree Kalong<sup>a</sup>, Atthapon Srifa<sup>a,\*</sup>, Sakhon Ratchahat<sup>a</sup>, Wanida Koo-amornpattana<sup>a</sup>,  
Yingyot Poo-arporn<sup>b</sup>, Wanwisa Limphirat<sup>b</sup>, Pongtanawat Khemthong<sup>c</sup>,  
Suttichai Assabumrungrat<sup>d,e</sup>, Keiichi Tomishige<sup>f</sup>, Sibudjing Kawi<sup>g</sup>

<sup>a</sup> Department of Chemical Engineering, Faculty of Engineering, Mahidol University,  
Nakhon Pathom 73170, Thailand

<sup>b</sup> Synchrotron Light Research Institute, Nakhon Ratchasima, 30000, Thailand

<sup>c</sup> National Nanotechnology Center (NANOTEC), National Science and Technology  
Development Agency (NSTDA), Pathum Thani 12120, Thailand

<sup>d</sup> Center of Excellence in Catalysis and Catalytic Reaction Engineering, Department of Chemical  
Engineering, Faculty of Engineering, Chulalongkorn University, Bangkok 10330, Thailand

<sup>e</sup> Bio-Circular-Green-economy Technology & Engineering Center (BCGeTEC), Department of  
Chemical Engineering, Faculty of Engineering, Chulalongkorn University, Bangkok 10330,  
Thailand

<sup>f</sup> Department of Applied Chemistry, School of Engineering, Tohoku University, 6-6-07 Aoba,  
Aramaki, Aoba-ku, Sendai, 980-8579, Japan,

<sup>g</sup> Department of Chemical & Biomolecular Engineering, National University of Singapore,  
117585, Singapore

\*Corresponding authors.

Email address: atthapon.sri@mahidol.edu (A. Srifa)

**Table S1** Comparison of the catalytic performance for the hydrogenolysis of 5-HMF to 2,5-DMF over the Ni-based catalysts in batch and continuous operations

| Catalyst                                                              | Reactor type                                    | Solvent     | T<br>(°C) | Time<br>(h)               | P<br>(bar) | 5-HMF<br>conv.<br>(%) | 2,5-DMF<br>yield<br>(%) | Ref.      |
|-----------------------------------------------------------------------|-------------------------------------------------|-------------|-----------|---------------------------|------------|-----------------------|-------------------------|-----------|
| CuNi/Biochar                                                          | Batch reactor                                   | THF         | 220       | 6                         | 40         | 100                   | 93.5                    | 1         |
| FeCoNi/h-BN                                                           | Batch reactor                                   | THF         | 180       | 4.5                       | 20         | 100                   | 94                      | 2         |
| Co-CoO <sub>x</sub> -FeNiCo/ $\gamma$ -Al <sub>2</sub> O <sub>3</sub> | Batch reactor                                   | THF         | 190       | 4                         | 10         | 100                   | 99.9                    | 3         |
| Ni/ZrP                                                                | Batch reactor                                   | THF         | 240       | 5                         | 50         | 100                   | 68.1                    | 4         |
| Ni <sub>2</sub> In/MgO-Al <sub>2</sub> O <sub>3</sub>                 | Batch reactor                                   | THF         | 200       | 10                        | 10         | 100                   | 93.2                    | 5         |
| NiCo                                                                  | Batch reactor                                   | THF         | 200       | 4                         | 5          | 100                   | 80.1                    | 6         |
| Ni/WO <sub>3</sub>                                                    | Batch reactor                                   | Water       | 180       | 6                         | 10         | >99                   | 96                      | 7         |
| NiZnAl                                                                | Batch reactor                                   | 1,4-dioxane | 180       | 12                        | 15         | 100                   | 93.6                    | 8         |
| NiZn                                                                  | Batch reactor                                   | 2-propanol  | 180       | 4                         | 20         | 100                   | 99                      | 9         |
| NiFe/TiO <sub>2</sub>                                                 | Batch reactor                                   | 1,4-dioxane | 220       | 1                         | 30         | 100                   | 75                      | 10        |
| NiFe/CNT                                                              | Batch reactor                                   | 1-butanol   | 200       | 3                         | 30         | 100                   | 91.3                    | 11        |
| NiCu/ZrO <sub>2</sub>                                                 | Continuous fixed-bed reactor<br>(Gas phase)     | 1-butanol   | 275       | WHSV=0.15 h <sup>-1</sup> | 15         | 100                   | 70                      | 12        |
| NiCu/Carbon                                                           | Continuous fixed-bed reactor<br>(Gas phase)     | 1-butanol   | 275       | WHSV=0.15 h <sup>-1</sup> | 15         | 100                   | 45                      | 13        |
| NiCo/Carbon                                                           | Continuous fixed-bed reactor<br>(Liquid phases) | THF         | 130       | WHSV=3.3 h <sup>-1</sup>  | 10         | 100                   | >90                     | 14        |
| Ni <sub>0.74</sub> Fe <sub>0.97</sub> Al                              | Continuous fixed-bed reactor<br>(Liquid phases) | Ethanol     | 160       | WHSV=0.3 h <sup>-1</sup>  | 40         | 100                   | 90.5                    | This work |

**Table S2** Number of acidic sites obtained from the NH<sub>3</sub>-TPD profiles of the reduced catalysts

| Catalysts                                | Weak acidic sites<br>(mmol NH <sub>3</sub> /g <sub>cat</sub> ) | Strong acidic sites<br>(mmol NH <sub>3</sub> /g <sub>cat</sub> ) |
|------------------------------------------|----------------------------------------------------------------|------------------------------------------------------------------|
| Al <sub>2</sub> O <sub>3</sub>           | 0.62                                                           | 1.03                                                             |
| FeAl                                     | 0.12                                                           | 0.55                                                             |
| Ni <sub>0.74</sub> Fe <sub>0.97</sub> Al | 0.27                                                           | 1.20                                                             |
| NiAl                                     | 0.41                                                           | 1.46                                                             |

**Table S3** Elemental composition and physical properties of the fresh and spent Ni<sub>0.74</sub>Fe<sub>0.97</sub>Al catalysts

| Sample                                         | Elemental composition (%) <sup>(a)</sup> |     |                                | S <sub>BET</sub> <sup>(b)</sup>   | V <sub>p</sub> <sup>(c)</sup>      | D <sub>p</sub> <sup>(d)</sup> |
|------------------------------------------------|------------------------------------------|-----|--------------------------------|-----------------------------------|------------------------------------|-------------------------------|
|                                                | Fe                                       | Ni  | Al <sub>2</sub> O <sub>3</sub> | (m <sup>2</sup> g <sup>-1</sup> ) | (cm <sup>3</sup> g <sup>-1</sup> ) | (nm)                          |
| Fresh Ni <sub>0.74</sub> Fe <sub>0.97</sub> Al | 11.9                                     | 9.5 | 78.6                           | 164.2                             | 0.37                               | 9.2                           |
| Spent Ni <sub>0.74</sub> Fe <sub>0.97</sub> Al | 11.1                                     | 9.0 | 79.9                           | 157.2                             | 0.35                               | 9.2                           |

<sup>a</sup> Elemental composition obtained from XRF measurement.

<sup>b</sup> S<sub>BET</sub> obtained from the adsorption branch of the N<sub>2</sub> isotherm.

<sup>c</sup> V<sub>p</sub> calculated from N<sub>2</sub> adsorption at a relative pressure of ~0.99.

<sup>d</sup> D<sub>p</sub> obtained from the desorption branch using the BJH method.

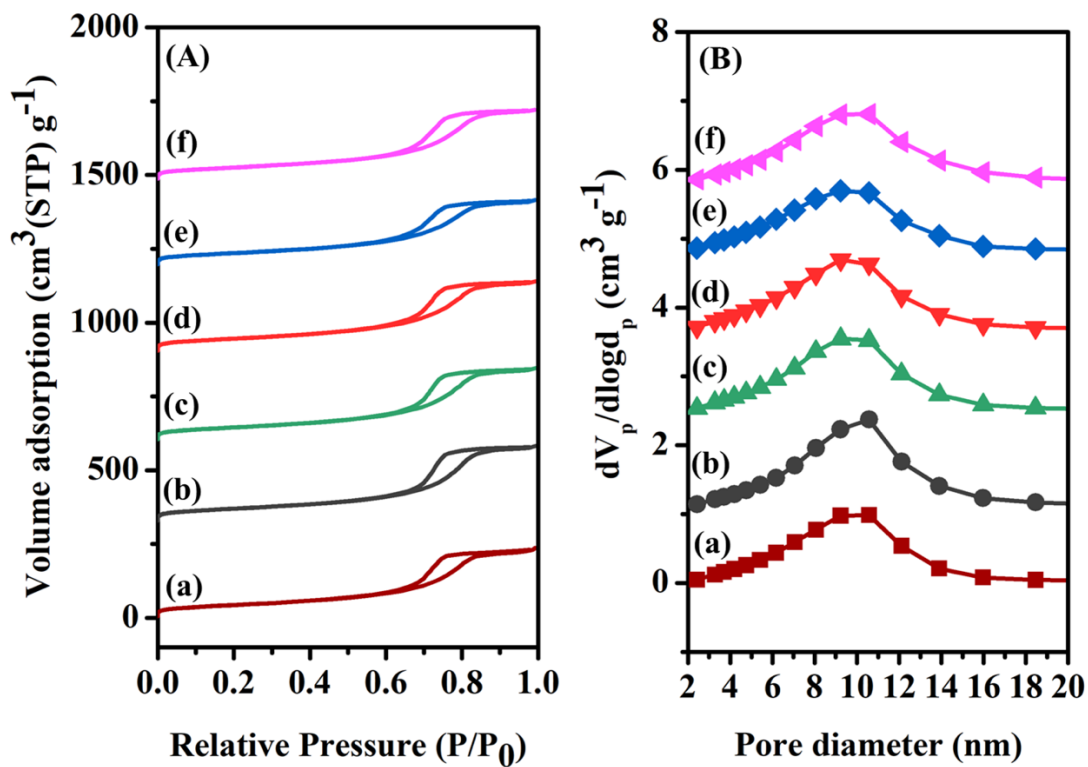

**Figure S1.** N<sub>2</sub> (A) adsorption and (B) desorption isotherms of FeAl, (b) Ni<sub>0.33</sub>Fe<sub>1.02</sub>Al, (c) Ni<sub>0.56</sub>Fe<sub>1.03</sub>Al, (d) Ni<sub>0.74</sub>Fe<sub>0.97</sub>Al, (e) Ni<sub>1.04</sub>Fe<sub>0.98</sub>Al, and (f) NiAl catalysts

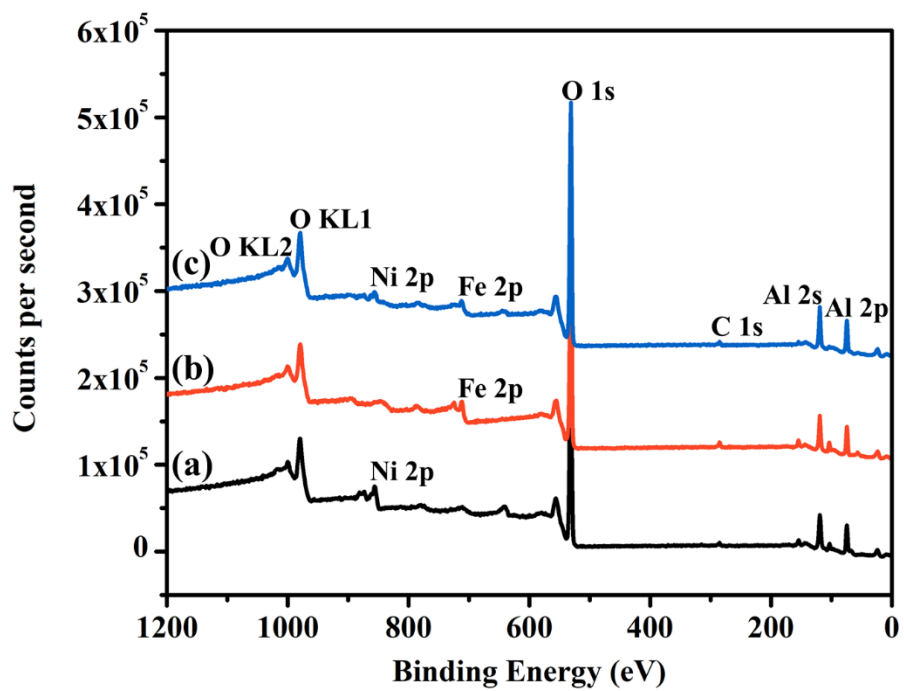

**Figure S2.** XPS survey of the reduced and passivated (a) NiAl, (b) FeAl, and (c)  $\text{Ni}_{0.74}\text{Fe}_{0.97}\text{Al}$  catalysts

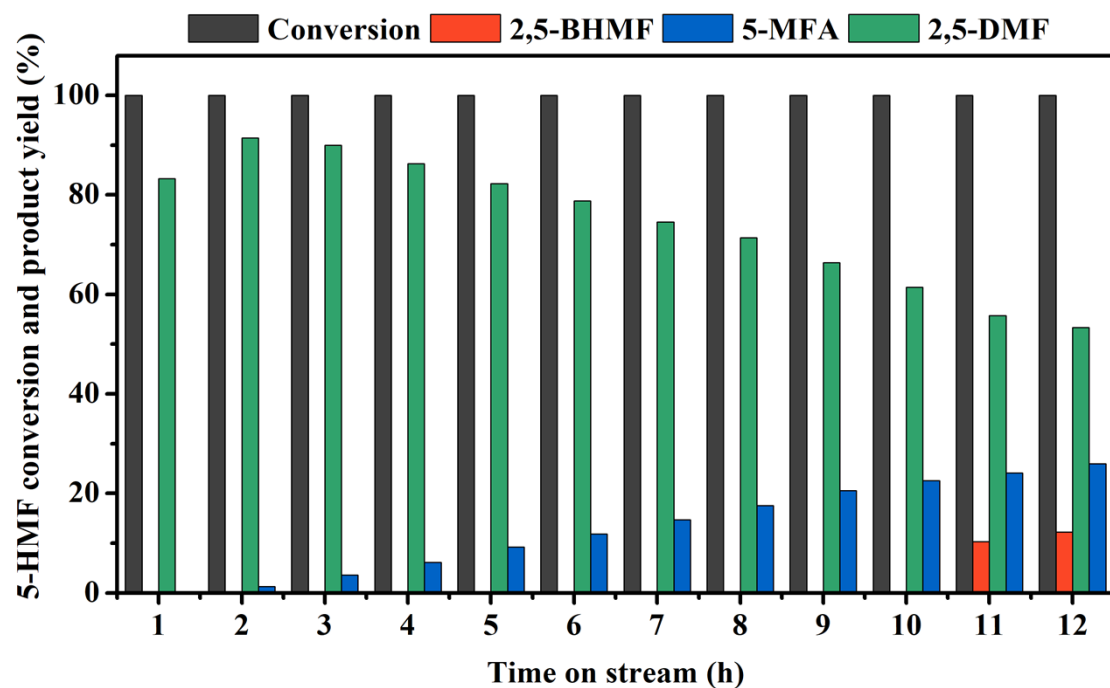

**Figure S3.** 5-HMF conversion and product yields on time-on-stream over  $\text{Ni}_{0.74}\text{Fe}_{0.97}\text{Al}$  catalyst at a reaction temperature of 160 °C,  $\text{H}_2$  pressure of 30 bar, and WHSV of 0.3  $\text{h}^{-1}$ . The mole ratio of  $\text{H}_2$  to 5-HMF was fixed at 1: 25.

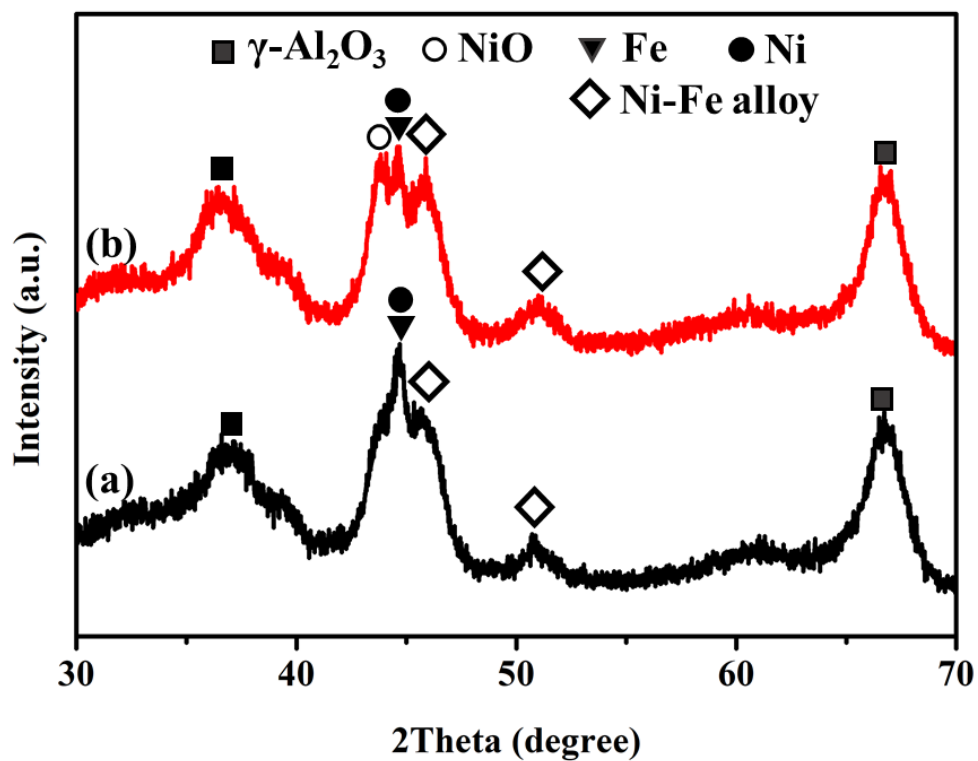

**Figure S4.** XRD patterns of the (a) reduced and (b) spent  $\text{Ni}_{0.74}\text{Fe}_{0.97}\text{Al}$  catalysts after a reaction temperature of 160 °C,  $\text{H}_2$  pressure of 30 bar, WHSV of 0.3  $\text{h}^{-1}$ , and 12 h time-on-stream.



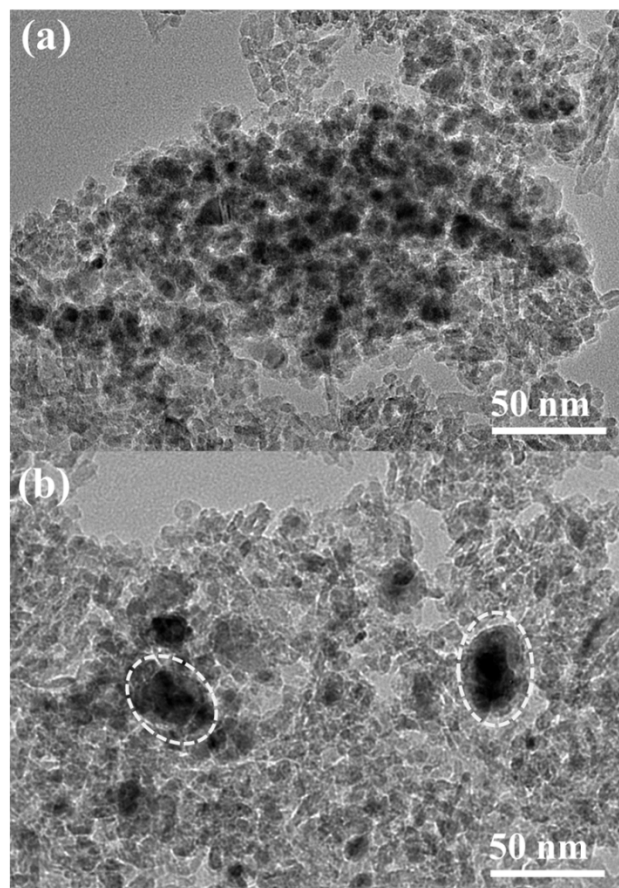

**Figure S5.** Typical TEM images of the (a) reduced and (b) spent  $\text{Ni}_{0.74}\text{Fe}_{0.97}\text{Al}$  catalysts after a reaction temperature of 160 °C,  $\text{H}_2$  pressure of 30 bar, WHSV of 0.3  $\text{h}^{-1}$ , and 12 h time-on-stream.

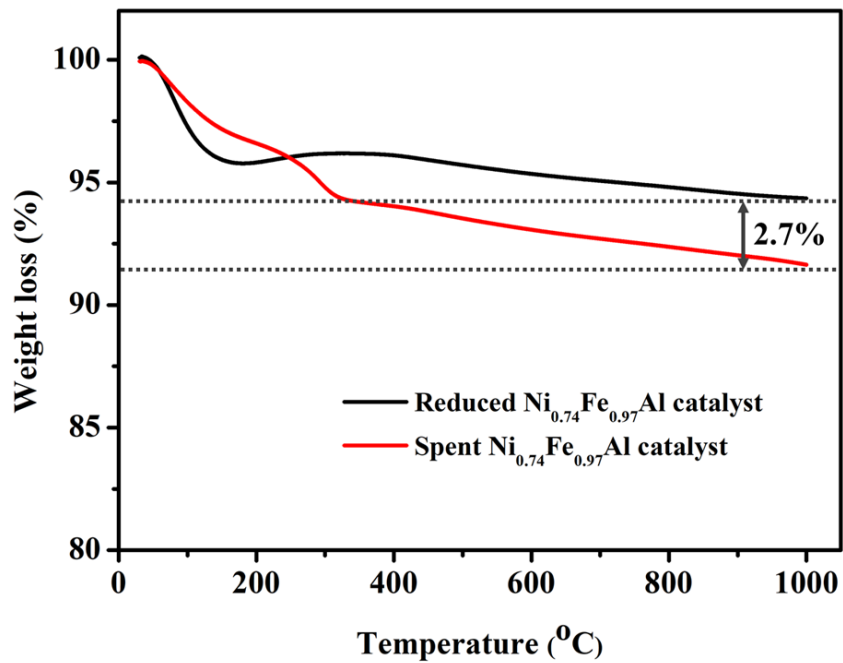

**Figure S6.** TGA profiles of the reduced and spent Ni<sub>0.74</sub>Fe<sub>0.97</sub>Al catalysts after a reaction temperature of 160 °C, H<sub>2</sub> pressure of 30 bar, WHSV of 0.3 h<sup>-1</sup>, and 12 h time-on-stream.

## References

1. Y. Yang, Q. Liu, D. Li, J. Tan, Q. Zhang, C. Wang and L. Ma, *RSC Advances*, 2017, **7**, 16311-16318.
2. N. Chen, Z. Zhu, T. Su, W. Liao, C. Deng, W. Ren, Y. Zhao and H. Lü, *Chemical Engineering Journal*, 2020, **381**, 122755.
3. R. Ahishakiye, F. Wang, X. Zhang, M. Sun, Y. Zhai, Y. Liu, Y. Wu, M. Li, M. Li and Q. Zhang, *Chemical Engineering Journal*, 2022, **450**, 138187.
4. C. Zhu, Q. Liu, D. Li, H. Wang, C. Zhang, C. Cui, L. Chen, C. Cai and L. Ma, *ACS Omega*, 2018, **3**, 7407-7417.
5. Y. Li, R. Wang, B. Huang, L. Zhang, X. Ma, S. Zhang, Z. Zhu, H. Lü and K. Yang, *Applied Surface Science*, 2022, **604**, 154579.
6. W. Zhao, Z. Huang, L. Yang, X. Liu, H. Xie and Z. Liu, *Applied Surface Science*, 2022, **577**, 151869.
7. N. Siddiqui, A. S. Roy, R. Goyal, R. Khatun, C. Pendem, A. N. Chokkapu, A. Bordoloi and R. Bal, *Sustainable Energy & Fuels*, 2018, **2**, 191-198.
8. X. Kong, Y. Zhu, H. Zheng, Y. Zhu and Z. Fang, *ACS Sustainable Chemistry & Engineering*, 2017, **5**, 11280-11289.
9. W. Han, S. Wang, Y. Liu, C. Li, N. Yuan, L. Zhou, M. Tang and H. Ge, *Molecular Catalysis*, 2022, **531**, 112698.
10. M. Przydacz, M. Jędrzejczyk, J. Rogowski, M. Szyrkowska-Jóźwik and A. M. Ruppert, *Energies*, 2020, **13**, 4660.
11. L. Yu, L. He, J. Chen, J. Zheng, L. Ye, H. Lin and Y. Yuan, *ChemCatChem*, 2015, **7**, 1701-1707.
12. N. Viar, J. M. Requies, I. Agirre, A. Iriondo, M. Gil-Calvo and P. L. Arias, *ACS Sustainable Chemistry & Engineering*, 2020, **8**, 11183-11193.
13. N. Viar, J. M. Requies, I. Agirre, A. Iriondo, C. García-Sancho and P. L. Arias, *Energy*, 2022, **255**, 124437.
14. P. Yang, Q. Xia, X. Liu and Y. Wang, *Journal of Energy Chemistry*, 2016, **25**, 1015-1020.
